# Supplementary material for: Wnt3 distribution in the zebrafish brain is determined by expression, diffusion and multiple molecular interactions
Source: eLife. 2020 Nov 25;9:e59489. doi: 10.7554/eLife.59489 (PMC7725503; doi:10.7554/eLife.59489)
Supplement: Figure 4—source data 1. [file elife-59489-fig4-data1.xlsx]

## Sheet: Sheet1
Wnt3EGFP - Cell															Wnt3EGFP - BV
		tauD1		tauD2		F2		tauTrip	Ftrip	D1	D2					tauD1		tauD2		F2		tauTrip	Ftrip		D1	D2
F1-1	2D_2p1t	0.0004936	5.017e-05	0.01408	0.0004257	0.6058	0.007129	3.802e-06	0.1957	28.363	0.994318				F1-1	0.000219	4.748e-05	0.001365	0.0001883	0.4075	0.06726	4.687e-06	0.1614	0.03539	73.0594	10.989
F1-2	2D_2p1t	0.0005222	0.000100126	0.033295	0.00870448	0.65005	0.00997021	5.17602e-06	0.16965	26.8097	0.420484				F1-2	0.0002952	1.483e-05	0.006919	0.001878	0.06515	0.0109	1.672e-06	0.2483	0.04005	54.2005	2.16794
F1-3	2D_2p1t	0.000524533	0.00018973	0.02294	0.00731928	0.588767	0.0131154	1.71111e-05	0.194867	26.6904	0.610288				F1-3	0.0003564	3.212e-05	0.003081	0.0008729	0.1219	0.03443	4.759e-06	0.1877	0.02128	44.8934	4.86855
F1-4	2D_2p1t	0.00045336	5.789e-05	0.0344	0.0005469	0.5822	0.01005	4.529e-06	0.1699	30.8805	0.406977				F1-4	0.000193	8.59e-06	0.005451	0.03481	0.01948	0.002599	3.55e-06	0.1862	0.02292	82.9016	2.75179
F1-5	2D_2p1t	0.0004921	5.521e-05	0.04241	0.0004597	0.5888	0.009489	3.875e-06	0.2192	28.4495	0.330111				F1-5	0.0002539	0.0001111	0.001055	0.0003707	0.3486	0.2064	1.601e-05	0.1008	0.03779	63.0169	14.218
F1-6	2D_2p1t	0.00042375	4.9851e-05	0.07345	0.000113137	0.6647	0.00353553	3.11127e-06	0.22855	33.0383	0.190606				F1-6	0.0002993	4.014e-05	0.00173	0.0004024	0.2267	0.06665	3.339e-06	0.1834	0.03183	53.4581	8.67052
F1-7	2D_2p1t	0.0005054	7.94788e-05	0.01754	0.00967322	0.5457	0.000565685	2.67993e-06	0.2144	27.7008	0.798176				F1-7	0.000312	4.215e-05	0.001722	0.0005191	0.1804	0.07227	4.036e-06	0.1789	0.02399	51.2821	8.7108
F1-8	2D_2p1t	0.0004857	8.591e-05	0.03543	0.001013	0.6026	0.01538	3.846e-05	0.09521	28.8244	0.395145				F1-8	0.0002516	2.627e-05	0.001948	0.0002973	0.2433	0.0389	2.02e-06	0.2434	0.04677	63.593	7.70021
F2-1	2D_2p1t	0.00051915	0.000180312	0.061645	0.00430628	0.57775	0.0127986	3.89687e-05	0.185	26.9672	0.227107				F1-9	0.0004015	2.208e-05	0.008213	0.003732	0.0436	0.01195	7.252e-06	0.1655	0.01958	39.8506	1.82637
F2-2	2D_2p1t	0.000482667	0.000179289	0.01957	0.00653666	0.5812	0.0117222	4.83308e-06	0.182733	29.0055	0.715381				F2-1	0.0002381	1.982e-05	0.004438	0.000733	0.1288	0.01369	1.185e-05	0.1055	0.02716	67.1987	3.3799
F2-3	2D_2p1t	0.000623	5.96366e-05	0.01756	0.00264388	0.587567	0.0108868	8.99086e-06	0.1528	22.4719	0.797267				F2-2	0.0003761	3.174e-05	0.004762	0.002672	0.0509	0.02397	6.808e-06	0.2042	0.01934	42.5419	3.14994
F2-4	2D_2p1t	0.0006732	0.000305329	0.02533	0.00106066	0.5843	0.000282843	1.88373e-05	0.18475	20.7962	0.552704				F2-3	0.0002994	1.368e-05	0.00702	0.001952	0.06307	0.009854	2.625e-06	0.219	0.04781	53.4402	2.13675
F2-5	2D_2p1t	0.00070635	0.000103874	0.082615	0.0019304	0.5718	0.0124451	1.47078e-06	0.17275	19.8202	0.169461				F2-4	0.0002649	3.626e-05	0.001797	0.0005092	0.1915	0.06312	1.633e-06	0.3299	0.06042	60.4002	8.34725
F2-6	2D_2p1t	0.000429789	6.927e-05	0.0231	0.001045	0.6086	0.009445	4.275e-06	0.1933	32.5741	0.606061				F2-5	0.000402	1.219e-05	0.002959	0.4243	0.0309	0.02317	5.415e-06	0.2232	0.02485	39.801	5.06928
F3-1	2D_2p1t	0.00041027	2.82843e-05	0.01743	0.00115966	0.7733	0.0121622	1.51887e-05	0.18505	34.1239	0.803213				F3-1	0.0002715	1.679e-05	0.003786	0.001129	0.0821	0.01876	2.314e-06	0.2378	0.06348	58.9319	3.96197
F3-2	2D_2p1t	0.0005515	8.903e-05	0.05473	0.0006231	0.6365	0.01078	6.61e-06	0.1854	25.3853	0.255801				F3-2	0.0002328	2.005e-05	0.001995	0.0004633	0.1524	0.03563	8.216e-07	0.4562	0.1259	68.7285	7.5188
F3-3	2D_2p1t	0.00043	4.326e-05	0.01583	0.0006323	0.6134	0.007897	2.054e-06	0.2359	32.5581	0.884397				F3-3	0.00034271	3.698e-05	0.00771	0.006133	0.03208	0.01782	1.181e-05	0.19	0.0224	46.6867	1.94553
F3-4	2D_2p1t	0.00066185	0.000113208	0.014805	0.00495682	0.65809	0.0196576	2.45366e-06	0.24225	21.1528	0.945626				F3-4	0.0003274	3.47e-05	0.002932	0.001856	0.0642	0.04168	5.987e-06	0.1833	0.02846	48.8699	5.11596
F3-5	2D_2p1t	0.0004596	5.06288e-05	0.02016	0.00110309	0.5725	0.0165463	3.53553e-08	0.1826	30.4613	0.694444				F3-5	0.0004256	2.769e-05	0.01181	0.004228	0.05939	0.01037	6.366e-06	0.2576	0.02006	37.594	1.27011
F3-6	2D_2p1t	0.0004994	0.000173524	0.018885	0.00160513	0.61725	0.0226981	4.31335e-06	0.23165	28.0336	0.741329				F4-1	0.0002709	1.3434e-05	0.02297	0.03176	0.01606	0.00836	8.18e-06	0.269	0.02058	59.0624	0.653026
F4-1	2D_2p1t	0.0005386	4.74e-05	0.03389	0.0005198	0.5769	0.009274	1.872e-06	0.2488	25.9933	0.413101				F4-2	0.0002615	2.092e-05	0.01146	0.008053	0.02875	0.01038	2.432e-06	0.2978	0.03326	61.1855	1.3089
F4-2	2D_2p1t	0.00048105	0.0001031	0.02687	0.0009217	0.5811	0.00828	1.701e-05	0.146	29.103	0.521027				F4-3	0.0003647	3.362e-05	0.005579	0.002112	0.07928	0.02212	8.274e-06	0.1883	0.02752	43.8717	2.68865
F4-3	2D_2p1t	0.00046241	9.355e-05	0.0111	0.0006214	0.5653	0.01618	5.754e-06	0.205	30.2762	1.26126				F4-4	0.0003115	3.111e-05	0.00513	0.00188	0.08156	0.02164	2.065e-05	0.08719	0.03845	51.3644	2.92398
F4-4	2D_2p1t	0.0006186	5.706e-05	0.0518	0.0006048	0.5687	0.006723	1.26e-06	0.2505	22.6317	0.27027				F4-5	0.0003549	4.484e-05	0.003717	0.00203	0.07375	0.03864	9.199e-06	0.197	0.02668	45.0831	4.03551
Mean						0.604286				27.588	0.583523				Mean					0.116307					54.6256	4.8087
SD						0.0460859				3.8918	0.281019				SD					0.10131					11.2884	3.39665
SecEGFP-Cell															SecEGFP - Brain Ventricle
		tauD1	tauTrip	Ftrip	D1											tauD1	tauTrip	Ftrip	D1
F1-1		0.000224641	4.33692e-06	0.515581	57.8701										F1-1	0.0001459	6.327e-06	0.1377	82.2481
F1-2		0.000187521	6.30672e-06	0.534182	69.3257										F1-2	0.0001275	3.574e-06	0.09829	94.1176
F1-3		0.000158605	2.05166e-06	0.643685	81.9647										F1-3	0.0001332	2.291e-06	0.1421	90.0901
F1-4		0.000257143	1.7665e-06	0.646195	50.5556										F1-4	0.0001209	2.03e-06	0.1083	99.2556
F2-1		0.000260775	3.56624e-06	0.400829	49.8514										F1-5	0.0001218	1.414e-06	0.1415	98.5222
F2-2		0.000276761	1.89211e-06	0.638285	46.9719										F2-1	0.0001398	6.656e-06	0.1373	85.8369
F2-3		0.000286015	4.96727e-06	0.354262	45.4521										F2-2	0.0001187	8.31e-07	0.1946	101.095
F2-4		0.000156796	1.17507e-05	0.313947	82.91										F2-3	0.0001213	1.842e-06	0.1121	98.9283
F2-5		0.000419456	9.54666e-06	0.556764	30.9925										F2-4	0.0001835	7.289e-06	0.2524	65.3951
F2-6		0.000254527	2.72584e-06	0.638702	51.0751										F2-5	0.0001394	5.755e-06	0.1181	86.0832
F3-1		0.000269606	7.21308e-06	0.882535	48.2184										F2-6	0.0001765	6.831e-06	0.2221	67.9887
F3-2		0.000227192	4.44718e-06	0.685472	57.2204										F3-1	0.0001408	2.779e-06	0.1559	85.2273
F3-3		0.000260161	3.00264e-06	0.297193	49.969										F3-2	0.0001248	2.863e-06	0.1035	96.1538
F4-1		0.000176012	4.03134e-06	0.432871	73.8584										F3-3	0.0001396	4.707e-06	0.1302	85.9599
F4-2		0.000181371	4.44718e-06	0.325577	71.6761										F4-1	0.0001245	9.248e-07	0.1877	96.3855
															F4-2	0.0001267	1.784e-06	0.1453	94.7119
Mean					57.8608										F4-3	0.0001452	6.946e-06	0.1295	82.6446
SD					14.3768										F4-4	0.0001871	6.721e-06	0.2642	64.1368
															Mean				87.4878
															SD				11.3287
