# Supplementary material for: Wnt3 distribution in the zebrafish brain is determined by expression, diffusion and multiple molecular interactions
Source: eLife. 2020 Nov 25;9:e59489. doi: 10.7554/eLife.59489 (PMC7725503; doi:10.7554/eLife.59489)
Supplement: Figure 5—source data 1. [file elife-59489-fig5-data1.xlsx]

## Sheet: Sheet1
Wnt3EGFP								SecEGFP
	tau1 (s)	r (µm)	Deff					tau1 (s)	r (µm)	Deff
	641.45	40	0.561228					32.2	30
	454.69	40	0.791748					24.66	30	8.21168
	320.94	30	0.630959					19.35	30	10.4651
	367.85	30	0.550496					11.46	30	17.6702
	465.58	30	0.434941					14.1	30	14.3617
	393.66	30	0.514403					31.6	30	6.40823
	470.5	30	0.430393					13.45	30	15.0558
	411.25	30	0.492401					16.9	30	11.9822
	503.65	30	0.402065					12.5	30	16.2
	344.54	30	0.58774					11.9	30	17.0168
	401.9	30	0.503857
Mean	434.183		0.536385					18.812		13.0413
SD			0.10473							4.00142
