# Supplementary material for: Wnt3 distribution in the zebrafish brain is determined by expression, diffusion and multiple molecular interactions
Source: eLife. 2020 Nov 25;9:e59489. doi: 10.7554/eLife.59489 (PMC7725503; doi:10.7554/eLife.59489)
Supplement: Figure 6—source data 1. [file elife-59489-fig6-data1.xlsx]

## Sheet: Sheet1
Cgr	Cg.Cr
6.21e-09	5.43e-17
6.4e-09	1.59e-16											Wnt3EGFP after LRP5 KD
2.36e-09	6.43e-17											tau1 (s)	r (µm)	Deff
4.96e-08	1.4e-15											112.22	30	2.00499
8.51e-09	2.5e-16											65.17	30	3.45251
2.78e-09	9.5e-17											149.91	30	1.5009
4.34e-09	1.67e-16											69.1	30	3.25615
2.1e-09	8.46e-17											57.91	30	3.88534
4.47e-09	1.89e-16											91.6	30	2.45633
3.7e-08	1.72e-15											87.86	30	2.56089
4.41e-09	2.62e-16											66.6	30	3.37838
1.85e-08	1.25e-15											59.5	30	3.78151
6.8e-09	5.83e-16											88	30	2.55682
9.29e-09	8.74e-16
1.73e-08	1.69e-15
2.83e-08	3.14e-15											86.925		2.88338
1.88e-08	2.14e-15													0.781342
1.38e-08	1.82e-15
5.64e-08	7.84e-15
4.8e-09	6.75e-16
6.01e-08	9.13e-15
7.59e-09	1.22e-15
2.46e-09	5.91e-16
Slope of curve fitted in Igor = 1.1245 e-07 +/- 1.48e-08 ; r2 of fit (V_pr in Igor) = 0.85
