# Supplementary material for: Wnt3 distribution in the zebrafish brain is determined by expression, diffusion and multiple molecular interactions
Source: eLife. 2020 Nov 25;9:e59489. doi: 10.7554/eLife.59489 (PMC7725503; doi:10.7554/eLife.59489)
Supplement: Table 1—source data 2. [file elife-59489-table1-data2.xlsx]

## Sheet: Wnt3 Heparinase and Surfen
Wnt3EGFP
Before Heparinase - Batch 1 ,2													After Heparinase - Batch 1,2												Wnt3EGFP Surfen Treatment
	tauD1		tauD2		F2		tauTrip	Ftrip	D1	D2				tauD1		tauD2		F2		tauTrip	Ftrip	D1	D2
F1- 48hpf-NoHep-1	0.000407	0.000337	0.0232	0.00783	0.59	0.01	8.56e-06	0.24	34.398	0.603448			F1-48hpf-HeparinaseTreated-1	0.0002945	5.02046e-06	0.056269	0.00708521	0.66095	0.0287792	1.75362e-06	0.083	47.5382	0.248805				tauD1		tauD2		F2		tauTrip	Ftrip	D1	D2
F1- 48hpf-NoHep-2	0.000649	7.09e-05	0.0262	0.00293	0.61	0	2.71e-05	0.19	21.5716	0.534351			F1-48hpf-HeparinaseTreated-2	0.0002724	8.261e-05	0.01558	0.004736	0.6397	0.01797	2.563e-05	0.04781	51.395	0.898588		F1-1	2D_2p1t	0.0002572	0.0001028	0.01673	0.0003137	0.6258	0.01952	6.379e-06	0.1461	50.5443	0.777047
F1- 48hpf-NoHep-3	0.0006782	0.000118	0.0258	0.00792	0.58	0.02	1.83e-05	0.22	20.6429	0.542636			F1-48hpf-HeparinaseTreated-3	0.0002474	6.172e-05	0.03224	0.002602	0.7023	0.01249	9.428e-06	0.1122	56.5885	0.434243		F1-2	2D_2p1t	0.0002257	8.626e-05	0.02763	0.0009888	0.4842	0.02251	6.165e-06	0.1383	57.5986	0.470503
F1- 48hpf-NoHep-4	0.000489	6.58e-05	0.0463	0.00714	0.59	0	3.89e-06	0.17	28.6299	0.302376			F1-48hpf-HeparinaseTreated-4	0.0004026	7.737e-05	0.02951	0.002738	0.6462	0.02306	4.622e-06	0.1497	34.774	0.474415		F1-3	2D_2p1t	0.000245	7.176e-05	0.01287	0.001381	0.601	0.01535	6.348e-06	0.1317	53.0612	1.0101
F1- 48hpf-NoHep-5	0.000532	5.92e-05	0.0318	0.0012	0.59	0.01	4.08e-06	0.25	26.3158	0.440252			F1-48hpf-HeparinaseTreated-5	0.0003557	3.73352e-05	0.06743	0.0237164	0.66645	0.0263751	5.0841e-06	0.1276	39.359	0.207623		F1-4	2D_2p1t	0.0003175	5.578e-05	0.02937	0.0008897	0.5987	0.01735	3.948e-06	0.1357	40.9449	0.442629
F1- 48hpf-NoHep-6	0.000482	4.61e-05	0.0474	0.000467	0.58	0.01	3.82e-06	0.24	29.0456	0.295359			F1-48hpf-HeparinaseTreated-6	0.00026006	0.0001561	0.07323	0.005581	0.6468	0.03122	1.001e-05	0.1445	53.8337	0.191178		F1-5	2D_2p1t	0.0003103	5.439e-05	0.03112	0.0009949	0.5369	0.01931	3.779e-06	0.141	41.8949	0.417738
F2- 48hpf-NoHep-1	0.0005745	0.000103	0.0275	0.00181	0.57	0.01	1.27e-06	0.29	24.369	0.509091			F1-48hpf-HeparinaseTreated-7	0.0003756	9.025e-05	0.06465	0.00431	0.5807	0.0267	5.827e-06	0.143	37.2737	0.216551		F1-6	2D_2p1t	0.000337	6.288e-05	0.04416	0.0008205	0.7814	0.02128	5.481e-06	0.1229	38.5757	0.294384
F2- 48hpf-NoHep-2	0.000813	0.000387	0.0417	0.00784	0.61	0.03	2.42e-05	0.16	17.2202	0.335731			F1-48hpf-HeparinaseTreated-8	0.00035054	3.21026e-05	0.06452	0.0123885	0.57915	0.0171827	8.27315e-07	0.12005	39.9384	0.216987		F1-7	2D_2p1t	0.0002844	5.997e-05	0.03336	0.0008791	0.6874	0.01994	2.942e-06	0.1368	45.7103	0.389688
F2- 48hpf-NoHep-3	0.0004926	9.17e-05	0.0354	0.00126	0.57	0.01	3.84e-06	0.32	28.4206	0.39548			F1-48hpf-HeparinaseTreated-9	0.000341	4.944e-05	0.07138	0.003524	0.6509	0.01165	5.06e-06	0.1208	41.0557	0.196133		F1-8	2D_2p1t	0.0003311	5.839e-05	0.02889	0.001006	0.5214	0.01769	3.068e-06	0.1417	39.2631	0.449983
F2- 48hpf-NoHep-4	0.000571	8.32e-05	0.0253	0.000908	0.57	0.01	1.54e-05	0.16	24.5184	0.55336			F1-48hpf-HeparinaseTreated-10	0.000314237	0.000152099	0.080125	0.0269903	0.69195	0.0211425	4.83661e-06	0.077	44.5523	0.174727		F1-9	2D_2p1t	0.000238	8.202e-05	0.02678	0.001097	0.6667	0.02237	8.618e-06	0.1033	54.6218	0.485437
F2- 48hpf-NoHep-5	0.000541	6.49e-05	0.0528	0.00058	0.58	0.01	4.58e-06	0.18	25.878	0.265152			F2-48hpf-HeparinaseTreated-1	0.00035135	9.4823e-05	0.061455	0.0100056	0.68375	0.0259508	7.70746e-07	0.16065	39.8463	0.227809		F1-10	2D_2p1t	0.0002803	5.188e-05	0.03069	0.0005947	0.71333	0.01329	3.658e-06	0.1331	46.3789	0.423591
F2- 48hpf-NoHep-6	0.00042	4.38e-05	0.0217	0.000713	0.58	0.01	4.52e-06	0.19	33.3333	0.645161			F2-48hpf-HeparinaseTreated-2	0.00024555	0.000118794	0.065255	0.00434871	0.6255	0.0183848	2.20617e-06	0.13135	57.0149	0.214543		F2-1	2D_2p1t	0.00028	7.075e-05	0.02093	0.0008916	0.7789	0.01992	4.449e-06	0.1256	46.4286	0.621118
F3- 48hpf-NoHep-1	0.000442	4.75e-05	0.0143	0.000545	0.59	0.01	3.39e-06	0.2	31.6742	0.979021			F2-48hpf-HeparinaseTreated-3	0.0003269	4.41e-05	0.04352	0.001679	0.6031	0.01537	5.741e-06	0.1514	42.8266	0.321691		F2-2	2D_2p1t	0.0003118	9.377e-05	0.01956	0.001795	0.6399	0.03145	3.432e-06	0.2045	41.6934	0.664622
F3- 48hpf-NoHep-2	0.0006274	0.000149	0.0159	0.000952	0.59	0.02	8.95e-06	0.23	22.3143	0.880503			F2-48hpf-HeparinaseTreated-4	0.0003264	2.60215e-05	0.05404	0.0013435	0.58905	0.00954594	1.47785e-06	0.092515	42.8922	0.259067		F2-3	2D_2p1t	0.0002926	0.000113	0.04945	0.003244	0.6176	0.02322	1.28e-05	0.1122	44.4293	0.262892
F3- 48hpf-NoHep-3	0.000809	0.000136	0.0302	0.00108	0.58	0.01	3.88e-05	0.11	17.3053	0.463576			F2-48hpf-HeparinaseTreated-5	0.0003424	5.021e-05	0.04111	0.002065	0.6175	0.02029	3.501e-06	0.132	40.8879	0.34055		F2-4	2D_2p1t	0.0002826	4.74e-05	0.01672	0.001212	0.7103	0.01954	5.307e-06	0.1272	46.0014	0.777512
F3- 48hpf-NoHep-4	0.0004347	6.11e-05	0.0144	0.000504	0.61	0.01	3.66e-06	0.34	32.2061	0.972222			F2-48hpf-HeparinaseTreated-6	0.000373	5.434e-05	0.05364	0.00245	0.6466	0.01694	3.344e-06	0.1426	37.5335	0.260999		F2-5	2D_2p1t	0.0003414	4.684e-05	0.03539	0.00175	0.8103	0.01909	2.481e-06	0.1608	38.0785	0.367335
F3- 48hpf-NoHep-5	0.000689	0.000102	0.0329	0.000681	0.61	0.02	4.08e-06	0.23	20.3193	0.425532			F3-48hpf-HeparinaseTreated-1	0.00034395	0.000111086	0.073635	0.00693672	0.58505	0.0255266	1.02021e-05	0.1918	40.7036	0.190127		F2-6	2D_2p1t	0.0004132	6.191e-05	0.04022	0.000474	0.6604	0.01519	2.818e-06	0.1442	31.4618	0.323222
F4- 48hpf-NoHep-1	0.0005733	8.51e-05	0.0225	0.000712	0.55	0.02	3.88e-06	0.2	24.42	0.622222			F3-48hpf-HeparinaseTreated-2	0.00035678	4.638e-05	0.04102	0.001903	0.6166	0.01749	3.59e-06	0.1706	39.2399	0.341297		F2-7	2D_2p1t	0.0004653	6.128e-05	0.01932	0.000622	0.5974	0.01658	3.005e-06	0.1435	27.939	0.672878
F4- 48hpf-NoHep-2	0.000577	9.19e-05	0.0131	0.000633	0.62	0.01	5.68e-06	0.19	24.2634	1.0687			F3-48hpf-HeparinaseTreated-3	0.0003578	6.494e-05	0.01442	0.002595	0.6286	0.01671	6.897e-06	0.1155	39.128	0.970874		F2-8	2D_2p1t	0.0003791	4.88e-05	0.03283	0.001203	0.645	0.013	6.407e-06	0.1314	34.2917	0.395979
F4- 48hpf-NoHep-3	0.000506	6.41e-05	0.0134	0.000619	0.55	0.01	7.92e-06	0.15	27.668	1.04478			F3-48hpf-HeparinaseTreated-4	0.00041565	8.47821e-05	0.023255	0.0084075	0.607	0.0111723	1.06547e-05	0.14095	33.6822	0.602021		F3-1	2D_2p1t	0.0003257	4.297e-05	0.01742	0.0004666	0.5523	0.01694	4.622e-06	0.1416	39.914	0.746269
F4- 48hpf-NoHep-4	0.000443	0.000125	0.0264	0.000714	0.57	0.01	1.85e-06	0.21	31.6027	0.530303			F3-48hpf-HeparinaseTreated-5	0.0003018	2.872e-05	0.03759	0.001459	0.5885	0.01562	1.325e-06	0.1685	46.3883	0.372439		F3-2	2D_2p1t	0.0003292	3.794e-05	0.03009	0.00133	0.4973	0.01334	3.898e-06	0.1485	39.4897	0.432037
F4- 48hpf-NoHep-5	0.000454	8.95e-05	0.0204	0.00197	0.66	0.02	0	0.19	30.837	0.686275			F3-48hpf-HeparinaseTreated-6	0.00031395	4.02344e-05	0.049575	0.0106844	0.5866	0.0257387	2.38295e-06	0.15895	44.5931	0.2824		F3-3	2D_2p1t	0.0002905	5.394e-05	0.0662	0.0008207	0.6658	0.02056	3.353e-06	0.1122	44.7504	0.196375
													F3-48hpf-HeparinaseTreated-7	0.0003581	0.000107	0.025068	0.001982	0.6	0.01	5.3e-07	0.14	39.0952	0.558481		F3-4	2D_2p1t	0.0002731	4.263e-05	0.04064	0.001167	0.8233	0.01466	2.355e-06	0.1414	47.6016	0.319882
Before Heparinase - batch 3,4,5													F4-48hpf-HeparinaseTreated-1	0.0002825	7.18e-05	0.03844	0.0228	0.58	0.02	6.35e-06	0.13	49.5575	0.364204		F3-5	2D_2p1t	0.0002692	5.402e-05	0.00909	0.0006967	0.6025	0.01882	3.079e-06	0.1242	48.2912	1.43014
F1-48hpf-NoHep-1	0.000849	0.000102	0.0241	0.00118	0.58	0.01	4.02e-06	0.21	17.6678	0.622407			F4-48hpf-HeparinaseTreated-2	0.000365	5.48e-05	0.03991	0.00528	0.62	0.03	1.91e-06	0.13	38.3562	0.350789		F3-6	2D_2p1t	0.0003005	5.301e-05	0.03272	0.00101	0.6395	0.0169	3.657e-06	0.1257	43.2612	0.397311
F1-48hpf-NoHep-2	0.000804	0.000126	0.0402	0.0206	0.59	0	1.18e-05	0.27	18.6567	0.373134			F4-48hpf-HeparinaseTreated-3	0.000368	5.18e-05	0.0499	0.0112	0.67	0.03	5.23e-07	0.14	38.0435	0.280561		F3-7	2D_2p1t	0.0003668	6.071e-05	0.05057	0.000358	0.654	0.01282	3.636e-06	0.1222	35.4417	0.257069
F1-48hpf-NoHep-3	0.000666	9.3e-05	0.0242	0.00119	0.59	0.01	5.47e-06	0.24	22.5225	0.619835			F4-48hpf-HeparinaseTreated-4	0.0004	1.47e-05	0.0288	0.00379	0.61	0	1.59e-05	0.16	35	0.486111		F4-1	2D_2p1t	0.0003837	6.903e-05	0.0249	0.0007601	0.6421	0.02244	5.005e-06	0.1044	33.8806	0.522088
F1-48hpf-NoHep-4	0.000577	4.75e-05	0.0261	0.000704	0.56	0.01	4.59e-06	0.22	25.9965	0.574713			F4-48hpf-HeparinaseTreated-5	0.000429	4.48e-05	0.02607	0.0106	0.58	0.02	3.89e-06	0.14	32.634	0.537016		F4-2	2D_2p1t	0.0003362	4.971e-05	0.0356	0.0004215	0.5688	0.02438	6.683e-06	0.1027	38.6675	0.365169
F1-48hpf-NoHep-5	0.000501	7.33e-05	0.0269	0.00309	0.61	0.04	5.66e-08	0.21	29.9401	0.557621			F4-48hpf-HeparinaseTreated-6	0.000315	2.14e-05	0.01702	0.00622	0.65	0.04	2.95e-06	0.13	44.4444	0.822562		F4-3	2D_2p1t	0.0003995	6.454e-05	0.0601	0.0007805	0.5684	0.02507	3.985e-06	0.1392	32.5407	0.216306
F1-48hpf-NoHep-6	0.000696	9.03e-05	0.042	0.00472	0.59	0.01	7.42e-07	0.19	21.5517	0.357143			F5-48hpf-HeparinaseTreated-1	0.000269	5.4e-05	0.0443	0.0113	0.69	0.02	3.64e-06	0.12	52.0446	0.316027		F4-4	2D_2p1t	0.0003263	7.533e-05	0.04105	0.0006392	0.6027	0.01331	2.59e-06	0.1597	39.8406	0.316687
F1-48hpf-NoHep-7	0.000496	5.89e-05	0.0642	0.00366	0.6	0	2.66e-06	0.16	30.2419	0.233645			F5-48hpf-HeparinaseTreated-2	0.000334	4.69e-05	0.0376	0.00172	0.66	0	6.79e-07	0.1	41.9162	0.37234		F4-5	2D_2p1t	0.0003374	5.116e-05	0.008805	0.0004612	0.5641	0.01962	5.519e-06	0.1274	38.5299	1.47643
F2-48hpf-NoHep-1	0.000636	9.88e-05	0.0144	0.00379	0.6	0.03	1.08e-05	0.18	23.5849	1.04167			F5-48hpf-HeparinaseTreated-3	0.000384	6.9e-05	0.0614	0.0271	0.65	0.02	3.99e-06	0.14	36.4583	0.228013
F2-48hpf-NoHep-2	0.000792	9.76e-05	0.0432	0.00235	0.58	0.01	7.79e-06	0.17	18.9394	0.347222			F5-48hpf-HeparinaseTreated-4	0.000303	4.74e-06	0.0444	0.00226	0.56	0.01	5.51e-06	0.14	46.2046	0.315315
F2-48hpf-NoHep-3	0.000683	0.000134	0.0268	0.00137	0.6	0.01	1.78e-05	0.16	21.9619	0.559701			F5-48hpf-HeparinaseTreated-5	0.000366	7.53e-05	0.0437	0.00264	0.58	0.01	4.58e-06	0.15	38.2514	0.320366						Mean		0.635248				42.0375	0.530748
F2-48hpf-NoHep-4	0.0005417	6.14e-05	0.0198	0.000852	0.59	0.01	8.33e-06	0.15	27.6906	0.757576																			SD		0.0865667				6.93167	0.308647
F2-48hpf-NoHep-5	0.000524	8.92e-05	0.0648	0.00381	0.57	0.01	2.31e-06	0.25	28.626	0.231481			After Heparinase -3,4,5
F2-48hpf-NoHep-6	0.000654	0.000106	0.0153	0.000857	0.59	0.01	5.72e-06	0.23	22.9358	0.980392			F1-48hpf-HeparinaseTreated-1	0.0002951	8.126e-05	0.05285	0.00026	0.6951	0.01737	1.205e-05	0.08959	50.8302	0.283822
F2-48hpf-NoHep-7	0.0004761	8.82e-05	0.0211	0.00112	0.56	0.01	4.1e-06	0.22	31.506	0.7109			F1-48hpf-HeparinaseTreated-2	0.0003348	6.705e-05	0.05877	0.0003024	0.6525	0.01753	9.489e-06	0.0819	44.8029	0.255232
F2-48hpf-NoHep-8	0.000553	6.93e-05	0.0538	0.000587	0.61	0.01	2.67e-06	0.26	27.1248	0.27881			F1-48hpf-HeparinaseTreated-3	0.0003244	6.933e-05	0.03959	0.0002034	0.68	0.02239	6.256e-06	0.11	46.2392	0.378884
F3-48hpf-NoHep-1	0.000481	7.5e-05	0.0129	0.000569	0.61	0.01	4.41e-06	0.24	31.185	1.16279			F1-48hpf-HeparinaseTreated-4	0.0005136	0.0001016	0.01115	0.0006832	0.6341	0.01619	7.287e-06	0.1665	29.2056	1.34529
F3-48hpf-NoHep-2	0.000636	3.52e-05	0.0163	0.00315	0.63	0.02	1.86e-06	0.18	23.5849	0.920245			F1-48hpf-HeparinaseTreated-5	0.0002565	4.525e-05	0.03487	0.0001466	0.6775	0.01858	2.48e-06	0.1882	58.4795	0.430169
F3-48hpf-NoHep-3	0.000653	2.68e-05	0.0145	0.00116	0.58	0	3.8e-06	0.24	22.9709	1.03448			F1-48hpf-HeparinaseTreated-6	0.000362	0.000181585	0.05946	0.00239851	0.67535	0.065266	6.80237e-06	0.1302	41.4365	0.25227
F3-48hpf-NoHep-4	0.000799	0.000113	0.0154	0.0022	0.58	0.02	5.7e-06	0.18	18.7735	0.974026			F1-48hpf-HeparinaseTreated-7	0.0003404	2.89914e-05	0.071125	3.46482e-05	0.63885	0.0163342	3.99515e-06	0.14015	44.0658	0.210896
F3-48hpf-NoHep-5	0.000653	9.39e-05	0.0527	0.00068	0.59	0.02	4.59e-06	0.22	22.9709	0.28463			F1-48hpf-HeparinaseTreated-8	0.00031815	2.67993e-05	0.03699	8.48528e-05	0.6217	0.0203647	6.03869e-07	0.1709	47.1476	0.405515
F4-48hpf-NoHep-1	0.000768	0.000102	0.0279	0.00167	0.59	0.01	5.44e-06	0.2	19.5312	0.537634			F1-48hpf-HeparinaseTreated-9	0.0003452	1.8809e-05	0.05873	0.000210718	0.6381	0.0169706	1.14551e-06	0.14495	43.4531	0.255406
F4-48hpf-NoHep-2	0.000694	0.000106	0.0257	0.00688	0.59	0	2.8e-05	0.25	21.6138	0.583658			F1-48hpf-HeparinaseTreated-10	0.0002533	1.23037e-05	0.03589	0.000337997	0.65005	0.00968736	1.18935e-06	0.1696	59.2183	0.417944
F4-48hpf-NoHep-3	0.000801	4.48e-05	0.0194	0.000686	0.56	0	3.69e-06	0.19	18.7266	0.773196			F2-48hpf-HeparinaseTreated-1	0.00029005	1.97283e-05	0.01339	0.00025173	0.59025	0.00756604	2.92035e-06	0.1533	51.7152	1.12024
F4-48hpf-NoHep-4	0.000917	0.000494	0.0216	0.00796	0.58	0.03	4.13e-06	0.24	16.3577	0.694444			F2-48hpf-HeparinaseTreated-2	0.00029525	3.59917e-05	0.053225	0.000146371	0.6591	0.0019799	1.3435e-06	0.11165	50.8044	0.281822
F4-48hpf-NoHep-5	0.000787	0.000451	0.0228	0.0164	0.62	0	8.56e-06	0.2	19.0597	0.657895			F2-48hpf-HeparinaseTreated-3	0.0003397	6.943e-05	0.04929	0.0002424	0.6488	0.0185	7.91e-06	0.107	44.1566	0.304321
													F2-48hpf-HeparinaseTreated-4	0.0003953	4.96389e-05	0.075095	0.000917117	0.63585	0.00997021	5.33159e-06	0.1319	37.9459	0.199747
Mean					0.589362				24.6952	0.616272			F2-48hpf-HeparinaseTreated-5	0.000325	7.81e-05	0.0384	0.00108	0.64	0.03	7.03e-06	0.12	46.1538	0.390625
SD					0.0207728				4.88556	0.256897			F2-48hpf-HeparinaseTreated-6	0.000307	3.4e-05	0.0473	0.000183	0.61	0.01	2.01e-06	0.16	48.8599	0.317125
													F2-48hpf-HeparinaseTreated-7	0.000301	5.76e-05	0.0365	0.000171	0.67	0.02	3.92e-06	0.14	49.8339	0.410959
													F2-48hpf-HeparinaseTreated-8	0.000409	7.06e-05	0.0403	0.00023	0.62	0.03	4.24e-06	0.13	36.6748	0.372208
													F3-48hpf-HeparinaseTreated-1	0.000285	2.41e-05	0.0384	0.000594	0.68	0.04	2.7e-06	0.11	52.6316	0.390625
													F3-48hpf-HeparinaseTreated-2	0.000343	0.0001	0.0456	0.000253	0.71	0.02	7.58e-06	0.12	43.7318	0.328947
													F3-48hpf-HeparinaseTreated-3	0.000271	7.78e-06	0.0331	0.000305	0.66	0.03	3.11e-07	0.13	55.3506	0.453172
Statistical significance Unpaired two tail T test Dfast	4.5931e-29												F3-48hpf-HeparinaseTreated-4	0.000323	8.21e-05	0.0433	0.000218	0.71	0.02	4.84e-06	0.14	46.4396	0.34642
													F3-48hpf-HeparinaseTreated-5	0.000286	4.97e-05	0.05	0.000269	0.71	0.06	1.36e-05	0.34	52.4476	0.3
													F3-48hpf-HeparinaseTreated-6	0.000444	0.000115	0.0646	0.000731	0.67	0.03	6.66e-06	0.12	33.7838	0.232198
													F3-48hpf-HeparinaseTreated-7	0.00053	9.77e-05	0.0566	0.00025	0.63	0	5.13e-06	0.17	28.3019	0.265018
													F4-48hpf-HeparinaseTreated-1	0.000557	1.18e-05	0.0207	0.000641	0.6	0	4.51e-06	0.16	26.93	0.724638
													F4-48hpf-HeparinaseTreated-2	0.000394	6.89e-05	0.0505	0.000268	0.64	0.02	3.38e-06	0.16	38.0711	0.29703
													F4-48hpf-HeparinaseTreated-3	0.000523	0.000108	0.048	0.00033	0.63	0.03	5.59e-06	0.13	28.6807	0.3125
													F4-48hpf-HeparinaseTreated-4	0.000289	5.9e-05	0.036	0.00039	0.71	0.01	3.09e-06	0.13	51.9031	0.416667
													Mean					0.639368				43.3706	0.385628
													SD					0.0385235				7.58517	0.223068

## Sheet: Lyn Heparinase and Surfen
Lyn Without Heparinase - 1,2,3														Lyn After Heparinase - 1,2,3												LynEGFP Surfen Treatment
	tauD1		tauD2		F2		tauTrip	Ftrip	D1	D2					tauD1		tauD2		F2		tauTrip	Ftrip	D1	D2
Lyn_NoHep_F1_1	0.000267	3.88e-05	0.0057	0.000192	0.67	0.01	2.78e-06	0.17	56.1798	2.63158				Lyn_HepTreated_F1_1	0.00036945	5.02046e-06	0.006269	0.000708521	0.66095	0.0287792	1.75362e-06	0.083	40.6009	2.39273				tauD1		tauD2		F2		tauTrip	Ftrip	D1	D2
Lyn_NoHep_F1_2	0.00029	7.14e-05	0.00848	0.000305	0.72	0.01	1.07e-05	0.1	51.7241	1.76887				Lyn_HepTreated_F1_2	0.0003724	8.261e-05	0.007558	0.0004736	0.6397	0.01797	2.563e-05	0.04781	40.2793	1.98465		F1-1	2D_2p1t	0.0002695	3.749e-05	0.004603	0.0001724	0.6197	0.02897	7.052e-06	0.1241	48.2375	2.82425
Lyn_NoHep_F1_3	0.000316	6.09e-05	0.00787	0.000323	0.69	0.01	5.8e-06	0.11	47.4684	1.90597				Lyn_HepTreated_F1_3	0.0002474	6.172e-05	0.006224	0.0002602	0.7023	0.01249	9.428e-06	0.1122	60.6306	2.41003		F1-2	2D_2p1t	0.0003399	8.739e-05	0.003078	0.0002229	0.6515	0.02332	8.234e-06	0.1035	38.2465	4.22352
Lyn_NoHep_F1_4	0.000327	0.000159	0.00543	0.00236	0.68	0.01	3.34e-06	0.14	45.8716	2.76243				Lyn_HepTreated_F1_4	0.0004126	7.737e-05	0.004951	0.0002738	0.6462	0.02306	4.622e-06	0.1497	36.3548	3.02969		F1-3	2D_2p1t	0.000307	3.397e-05	0.00473	0.0001826	0.7112	0.02173	4.839e-06	0.1409	42.3453	2.74841
Lyn_NoHep_F1_5	0.000336	5.14e-05	0.0059	0.000292	0.59	0.02	4.93e-06	0.14	44.6429	2.54237				Lyn_HepTreated_F1_5	0.0004557	3.73352e-05	0.006743	0.00237164	0.66645	0.0263751	5.0841e-06	0.1276	32.9164	2.22453		F1-4	2D_2p1t	0.000301	5.756e-05	0.003648	0.0001714	0.7476	0.01815	8.349e-06	0.1218	43.1894	3.5636
Lyn_NoHep_F1_6	0.00029	5.9e-05	0.00488	0.000235	0.63	0.02	9.06e-06	0.11	51.7241	3.07377				Lyn_HepTreated_F1_6	0.0006006	0.0001561	0.007323	0.0005581	0.6468	0.03122	1.001e-05	0.1445	24.975	2.04834		F1-5	2D_2p1t	0.0004093	7.059e-05	0.004027	0.0002302	0.6678	0.01256	8.015e-07	0.5498	31.7615	3.22821
Lyn_NoHep_F1_7	0.000269	5.68e-05	0.00678	0.000162	0.72	0.01	1.37e-05	0.09	55.7621	2.21239				Lyn_HepTreated_F1_7	0.0005756	9.025e-05	0.006465	0.000431	0.5807	0.0267	5.827e-06	0.143	26.0598	2.32019		F2-1	2D_2p1t	0.0002676	5.873e-05	0.004257	0.0001738	0.7093	0.02113	7.509e-06	0.1307	48.58	3.05379
Lyn_NoHep_F1_8	0.000376	8.28e-05	0.00603	0.000286	0.71	0.02	5.23e-06	0.13	39.8936	2.48756				Lyn_HepTreated_F1_8	0.0005054	3.21026e-05	0.006452	0.00123885	0.57915	0.0171827	8.27315e-07	0.12005	29.6795	2.32486		F2-2	2D_2p1t	0.0003426	0.0001	0.004558	0.0002527	0.6183	0.01453	8.309e-06	0.1373	37.9451	2.85213
Lyn_NoHep_F1_9	0.000618	6.72e-06	0.00723	0.00133	0.64	0.04	2e-06	0.13	24.2718	2.07469				Lyn_HepTreated_F2_1	0.000341	4.944e-05	0.008138	0.0003524	0.6509	0.01165	5.06e-06	0.1208	43.9883	1.8432		F2-3	2D_2p1t	0.0002765	4.528e-05	0.003092	0.0001354	0.6477	0.02584	6.797e-06	0.1451	47.0163	4.2044
Lyn_NoHep_F1_10	0.000499	0.000141	0.00662	0.0015	0.71	0.03	3.74e-06	0.13	30.0601	2.26586				Lyn_HepTreated_F2_2	0.00042375	0.000152099	0.0080125	0.00269903	0.69195	0.0211425	4.83661e-06	0.077	35.3982	1.87207		F2-4	2D_2p1t	0.0002655	3.819e-05	0.003524	0.0001451	0.6976	0.01694	5.419e-06	0.1143	48.9642	3.68899
Lyn_NoHep_F2_1	0.000396	0.000111	0.00768	0.000252	0.72	0.01	1.63e-05	0.11	37.8788	1.95312				Lyn_HepTreated_F2_3	0.00035135	9.4823e-05	0.0061455	0.00100056	0.68375	0.0259508	7.70746e-07	0.16065	42.6925	2.44081		F2-5	2D_2p1t	0.0003684	0.0001284	0.005956	0.0003476	0.6687	0.02022	7.195e-06	0.1209	35.2877	2.18267
Lyn_NoHep_F2_2	0.000683	8.91e-06	0.00826	0.000601	0.61	0.01	1.06e-05	0.08	21.9619	1.81598				Lyn_HepTreated_F2_4	0.0004555	0.000118794	0.0065255	0.000434871	0.6255	0.0183848	2.20617e-06	0.13135	32.9308	2.29867		F2-6	2D_2p1t	0.0002276	7.644e-05	0.003609	0.0001548	0.605	0.01664	5.878e-06	0.19108	57.1178	3.60211
Lyn_NoHep_F2_3	0.000728	0.000318	0.00512	0.000535	0.69	0.07	1.49e-05	0.12	20.6044	2.92969				Lyn_HepTreated_F2_5	0.0003269	4.41e-05	0.004352	0.0001679	0.6031	0.01537	5.741e-06	0.1514	45.8856	3.44669		F3-1	2D_2p1t	0.0003022	7.895e-05	0.003401	0.0001856	0.6041	0.01458	2.637e-06	0.09041	43.0179	3.82241
Lyn_NoHep_F2_4	0.000293	3.93e-05	0.00903	0.000188	0.68	0.01	7.85e-06	0.11	51.1945	1.66113				Lyn_HepTreated_F2_6	0.0003864	2.60215e-05	0.005404	0.00013435	0.58905	0.00954594	1.47785e-06	0.092515	38.8199	2.77572		F3-2	2D_2p1t	0.0003219	8.392e-05	0.002637	0.0001626	0.7415	0.01125	4.414e-06	0.0827	40.3852	4.92984
Lyn_NoHep_F3_1	0.000704	0.000127	0.0117	0.00201	0.63	0.03	1.8e-05	0.13	21.3068	1.28205				Lyn_HepTreated_F2_7	0.0003424	5.021e-05	0.004111	0.0002065	0.6175	0.02029	3.501e-06	0.132	43.8084	3.64875		F3-3	2D_2p1t	0.0004144	8.827e-05	0.005869	0.0003806	0.7257	0.01466	6.923e-06	0.1346	31.3707	2.21503
Lyn_NoHep_F3_2	0.000405	4.96e-05	0.0122	0.000721	0.69	0	6.67e-06	0.18	37.037	1.22951				Lyn_HepTreated_F2_8	0.000373	5.434e-05	0.005364	0.000245	0.6466	0.01694	3.344e-06	0.1426	40.2145	2.79642		F3-4	2D_2p1t	0.0002737	7.091e-05	0.004935	0.0002173	0.7075	0.01754	6.907e-06	0.06616	47.4973	2.63425
Lyn_NoHep_F3_3	0.000347	7.41e-05	0.00991	0.000408	0.65	0.01	1.17e-05	0.12	43.2277	1.51362				Lyn_HepTreated_F2_9	0.00034395	0.000111086	0.0073635	0.000693672	0.58505	0.0255266	1.02021e-05	0.1918	43.611	2.03707		F4-1	2D_2p1t	0.000373	7.904e-05	0.006006	0.0003329	0.6326	0.02438	7.165e-06	0.2453	34.8525	2.1645
Lyn_NoHep_F3_4	0.000676	0.000185	0.00821	0.000564	0.69	0.03	0	0.11	22.1893	1.82704				Lyn_HepTreated_F2_10	0.0002678	4.638e-05	0.004102	0.0001903	0.6166	0.01749	3.59e-06	0.1706	56.0119	3.65675		F4-2	2D_2p1t	0.0003804	5.375e-05	0.008364	0.0004219	0.6422	0.01721	3.092e-05	0.1365	34.1746	1.55428
Lyn_NoHep_F3_5	0.000559	9.59e-05	0.00992	0.000598	0.7	0	2.71e-06	0.15	26.8336	1.5121				Lyn_HepTreated_F2_11	0.0003578	6.494e-05	0.005442	0.0002595	0.6286	0.01671	6.897e-06	0.1155	41.9229	2.75634		F4-3	2D_2p1t	0.0003656	7.774e-05	0.006163	0.0002889	0.6295	0.02105	6.792e-06	0.2156	35.558	2.10936
Lyn_NoHep_F3_6	0.00034405	9.94899e-05	0.005402	0.000660438	0.6835	0.0424264	3.81838e-07	0.1226	43.5983	2.77675				Lyn_HepTreated_F2_12	0.00041565	8.47821e-05	0.0043255	0.00084075	0.607	0.0111723	1.06547e-05	0.14095	36.0881	3.46781
Lyn_NoHep_F3_7	0.000373	7.904e-05	0.006006	0.0003329	0.6687	0.02022	5.892e-06	0.1068	40.2145	2.4975				Lyn_HepTreated_F3_1	0.0003018	2.872e-05	0.003759	0.0001459	0.5885	0.01562	1.325e-06	0.1685	49.7018	3.99042
Lyn_NoHep_F4_1	0.0004053	0.0001003	0.007177	0.000423	0.605	0.01664	2.986e-05	0.06161	37.0096	2.09001				Lyn_HepTreated_F3_2	0.00031395	4.02344e-05	0.0049575	0.00106844	0.5866	0.0257387	2.38295e-06	0.15895	47.7783	3.02572						Mean		0.668194				41.4193	3.08899
Lyn_NoHep_F4_2	0.0003804	5.375e-05	0.008364	0.0004219	0.6041	0.01458	5.715e-06	0.1091	39.4322	1.7934				Lyn_HepTreated_F3_3	0.0002409	3.714e-05	0.005068	0.0001982	0.6448	0.01359	2.146e-06	0.2334	62.2665	2.95975						SD		0.0472891				6.91599	0.892155
Lyn_NoHep_F4_3	0.00031755	6.7953e-05	0.0052955	0.00122683	0.7166	0.0128693	3.74767e-07	0.1367	47.2367	2.83259				Lyn_HepTreated_F3_4	0.000581	0.000107	0.00844	0.00228	0.6	0.01	5.3e-07	0.14	25.8176	1.77725
Lyn_NoHep_F4_4	0.0003921	8.332e-05	0.004997	0.0002921	0.6326	0.02438	9.318e-06	0.1014	38.2555	3.0018				Lyn_HepTreated_F3_5	0.000525	7.18e-05	0.00991	0.000528	0.58	0.02	6.35e-06	0.13	28.5714	1.51362
Lyn_NoHep_F4_5	0.0003124	2.03647e-05	0.0044905	0.000311834	0.63585	0.00898026	1.41139e-05	0.142605	48.0154	3.34039				Lyn_HepTreated_F4_1	0.000365	5.48e-05	0.00499	0.00112	0.62	0.03	1.91e-06	0.13	41.0959	3.00601
Lyn_NoHep_F4_6	0.0005131	0.0001245	0.008077	0.0004484	0.6953	0.02195	5.323e-06	0.18	29.2341	1.85713				Lyn_HepTreated_F4_2	0.000368	5.18e-05	0.00488	0.000379	0.67	0.03	5.23e-07	0.14	40.7609	3.07377
Lyn_NoHep_F4_7	0.0002678	0.0001201	0.007382	0.0003112	0.7537	0.01932	2.555e-05	0.07614	56.0119	2.03197				Lyn_HepTreated_F4_3	0.000482	1.47e-05	0.00607	0.00106	0.61	0	1.59e-05	0.16	31.1203	2.47117
Lyn_NoHep_F4_8	0.000589	0.0001005	0.01014	0.0006057	0.6047	0.01929	7.328e-06	0.1383	25.4669	1.47929				Lyn_HepTreated_F4_4	0.000429	4.48e-05	0.00702	0.000622	0.58	0.02	3.89e-06	0.14	34.965	2.13675
														Lyn_HepTreated_F4_5	0.000315	2.14e-05	0.00443	0.00113	0.65	0.04	2.95e-06	0.13	47.619	3.386
Mean					0.669657				39.1141	2.17761				Lyn_HepTreated_F4_6	0.000269	5.4e-05	0.00376	0.000172	0.69	0.02	3.64e-06	0.12	55.7621	3.98936
SD					0.042869				11.1979	0.564783				Lyn_HepTreated_F5_1	0.000334	4.69e-05	0.00614	0.00271	0.66	0	6.79e-07	0.1	44.9102	2.443
														Lyn_HepTreated_F5_2	0.000384	6.9e-05	0.00444	0.000226	0.65	0.02	3.99e-06	0.14	39.0625	3.37838
														Lyn_HepTreated_F5_3	0.000403	4.74e-06	0.00437	0.000264	0.56	0.01	5.51e-06	0.14	37.2208	3.43249
														Lyn_HepTreated_F5_4	0.000626	7.53e-05	0.0157	0.000865	0.58	0.01	4.58e-06	0.15	23.9617	0.955414
Statistical significance - Unpaired Two tail T-Test	0.713157
														Mean					0.626793				40.0995	2.66613
														SD					0.037827				9.46221	0.711189

## Sheet: SecEGFP Heparinase and Surfen
SecEGFP Before Heparinase								SecEGFP After Heparinase							SecEGFP Surfen Treatment
	tauD1		tauTrip	D1					tauD1		tauTrip	D1
SecEGFP-F1-48hpf-NoHep-1	0.000222	8.61e-06	2.78e-06	67.5676				SecEGFP-F1-48hpf-Hep-1	0.00023747	6.262e-05	3.338e-06	63.1659			tauD1		Ftrip	D
SecEGFP-F1-48hpf-NoHep-2	0.000251	1.5e-05	3.72e-06	59.761				SecEGFP-F1-48hpf-Hep-2	0.0003052	4.474e-05	2.23e-06	49.1481		F1-1	0.00026585	4.983e-05	1.59948e-06	48.8998
SecEGFP-F1-48hpf-NoHep-3	0.000236	1.08e-05	2.12e-06	63.5593				SecEGFP-F1-48hpf-Hep-3	0.00030469	8.38e-05	2.008e-06	49.2304		F1-2	0.00021085	9.721e-05	2.10718e-06	61.6552
SecEGFP-F1-48hpf-NoHep-4	0.000236333	1.147e-05	3.24726e-06	63.4697				SecEGFP-F1-48hpf-Hep-4	0.000308933	6.372e-05	1.95532e-06	48.5542		F1-3	0.00025165	2.8425e-05	2.26203e-06	51.6591
SecEGFP-F1-48hpf-NoHep-5	0.0002801	5.662e-05	0	53.5523				SecEGFP-F1-48hpf-Hep-5	0.000231	3.775e-05	1.033e-05	64.9351		F1-4	0.00035005	0.0001301	1.42836e-06	37.1376
SecEGFP-F1-48hpf-NoHep-6	0.0002658	9.854e-06	0	56.4334				SecEGFP-F1-48hpf-Hep-6	0.000246	7.957e-05	0	60.9756		F1-5	0.00022075	2.454e-05	8.11759e-06	58.8901
SecEGFP-F1-48hpf-NoHep-7	0.0002232	9.037e-05	2.585e-06	67.2043				SecEGFP-F1-48hpf-Hep-7	0.00027721	8.929e-05	1.844e-05	54.1106		F1-6	0.000293167	3.149e-05	1.4508e-06	44.3434
SecEGFP-F1-48hpf-NoHep-8	0.000256367	5.22813e-05	4.0433e-06	58.5099				SecEGFP-F1-48hpf-Hep-8	0.0002659	0.0001127	2.087e-05	56.4122		F1-7	0.00025127	0.000148279	1.03014e-06	51.7372
SecEGFP-F2-48hpf-NoHep-1	0.000257	3.63e-05	3.13e-06	58.3658				SecEGFP-F2-48hpf-Hep-1	0.000315333	9.38533e-05	1.70299e-05	47.5687		F2-1	0.000194533	0.000127267	1.21144e-06	66.8266
SecEGFP-F2-48hpf-NoHep-2	0.000256	3.63e-05	0	58.5938				SecEGFP-F2-48hpf-Hep-2	0.0002582	1.368e-05	2.585e-05	58.0945		F2-2	0.00022528	1.47125e-05	5.2484e-06	57.706
SecEGFP-F2-48hpf-NoHep-3	0.0002565	3.63e-05	0	58.4795				SecEGFP-F2-48hpf-Hep-3	0.0002889	2.225e-06	2.337e-06	51.9211		F2-3	0.000307067	0.000112387	6.01161e-06	42.3361
SecEGFP-F2-48hpf-NoHep-4	0.000213	1.58e-05	1.75e-06	70.4225				SecEGFP-F2-48hpf-Hep-4	0.00027355	7.9525e-06	8.09991e-06	54.8346		F2-4	0.000211367	5.89467e-06	8.93976e-07	61.5045
SecEGFP-F2-48hpf-NoHep-5	0.000212	1.91e-05	2.2e-06	70.7547				SecEGFP-F2-48hpf-Hep-5	0.0003367	2.827e-05	1.091e-05	44.55		F2-5	0.0002526	8.1855e-05	8.39265e-06	51.4648
SecEGFP-F2-48hpf-NoHep-6	0.000201	1.34e-05	1.5e-06	74.6269				SecEGFP-F3-48hpf-Hep-1	0.00034865	0.0001159	1.623e-05	43.0231		F3-1	0.000236067	2.46633e-05	2.76044e-06	55.0692
SecEGFP-F2-48hpf-NoHep-7	0.000208667	1.61e-05	2.86182e-06	71.885				SecEGFP-F3-48hpf-Hep-2	0.00024962	0.0001374	1.344e-05	60.0913		F3-2	0.000268577	0.000172	3.31711e-06	48.4033
SecEGFP-F3-48hpf-NoHep-1	0.000359	0.00862	1.16e-05	41.7827				SecEGFP-F3-48hpf-Hep-3	0.00019398	9.38567e-05	5.7808e-05	77.3276		F3-3	0.00023012	1.76518e-05	1.68664e-06	56.4923
SecEGFP-F3-48hpf-NoHep-2	0.00034	0.00648	8.87e-06	44.1176				SecEGFP-F3-48hpf-Hep-4	0.00022976	1.897e-05	6.673e-06	65.2855		F3-4	0.00028046	4.08258e-05	6.28518e-06	46.3524
SecEGFP-F3-48hpf-NoHep-3	0.000356	0.00592	1.19e-06	42.1348				SecEGFP-F3-48hpf-Hep-5	0.0003331	5.108e-05	2.097e-05	45.0315		F3-5	0.000250244	0.000145652	6.84082e-06	51.9493
SecEGFP-F3-48hpf-NoHep-4	0.000351667	0.00700667	1.42497e-06	42.654				SecEGFP-F3-48hpf-Hep-6	0.0002939	7.751e-05	5.274e-05	51.0378		F3-6	0.00018616	4.61775e-05	5.44331e-06	69.8324
SecEGFP-F3-48hpf-NoHep-5	0.000238	0.00287	3.36e-06	63.0252				SecEGFP-F3-48hpf-Hep-7	0.00023399	4.91867e-05	2.93159e-05	64.1053
SecEGFP-F3-48hpf-NoHep-6	0.000207	0.00155	2.29e-06	72.4638				SecEGFP-F4-48hpf-Hep-1	0.0003494	8.355e-05	1.699e-05	42.9307						53.4588
SecEGFP-F3-48hpf-NoHep-7	0.000256	0.00519	7.27e-06	58.5938				SecEGFP-F4-48hpf-Hep-2	0.000389	8.4465e-05	1.29401e-06	38.5604						8.47325
SecEGFP-F3-48hpf-NoHep-8	0.000233667	0.00320333	1.84275e-05	64.194				SecEGFP-F4-48hpf-Hep-3	0.0002452	1.056e-05	2.844e-06	61.1746
SecEGFP-F4-48hpf-NoHep-1	0.000262	0.00193	2.73e-06	57.2519				SecEGFP-F4-48hpf-Hep-4	0.0002126	1.148e-05	1.686e-05	70.555
SecEGFP-F4-48hpf-NoHep-2	0.000222	0.00108	1.86e-06	67.5676				SecEGFP-F4-48hpf-Hep-5	0.0002578	5.047e-05	2.909e-05	58.1846
SecEGFP-F4-48hpf-NoHep-3	0.000242	0.001505	0.000601041	61.9835				SecEGFP-F4-48hpf-Hep-6	0.000238533	2.417e-05	2.27811e-05	62.8843
SecEGFP-F4-48hpf-NoHep-4	0.00024	2.59e-05	3.92e-06	62.5				SecEGFP-F4-48hpf-Hep-7	0.000206	8.732e-06	5.133e-06	72.8155
SecEGFP-F4-48hpf-NoHep-5	0.000359	9e-05	9.71e-06	41.7827				SecEGFP-F4-48hpf-Hep-8	0.0002234	1.567e-05	5.868e-06	67.1441
SecEGFP-F4-48hpf-NoHep-6	0.000263	1.64e-05	2.51e-06	57.0342				SecEGFP-F4-48hpf-Hep-9	0.0002247	1.103e-05	4.289e-06	66.7557
SecEGFP-F4-48hpf-NoHep-7	0.000287333	4.41e-05	4.00334e-05	52.2042
								Mean				56.9106
Mean				59.4159				SD				9.70895
SD				9.36543
Statistical significance - Unpaired Two tail T-Test	0.325909
