# Supplementary material for: Wnt3 distribution in the zebrafish brain is determined by expression, diffusion and multiple molecular interactions
Source: eLife journal article supplement (doi:10.7554/elife.59489), 2020-11-25

**A**

Tg(-4.0*wnt3*:Wnt3EGFP) with heparinase  
48 hpf

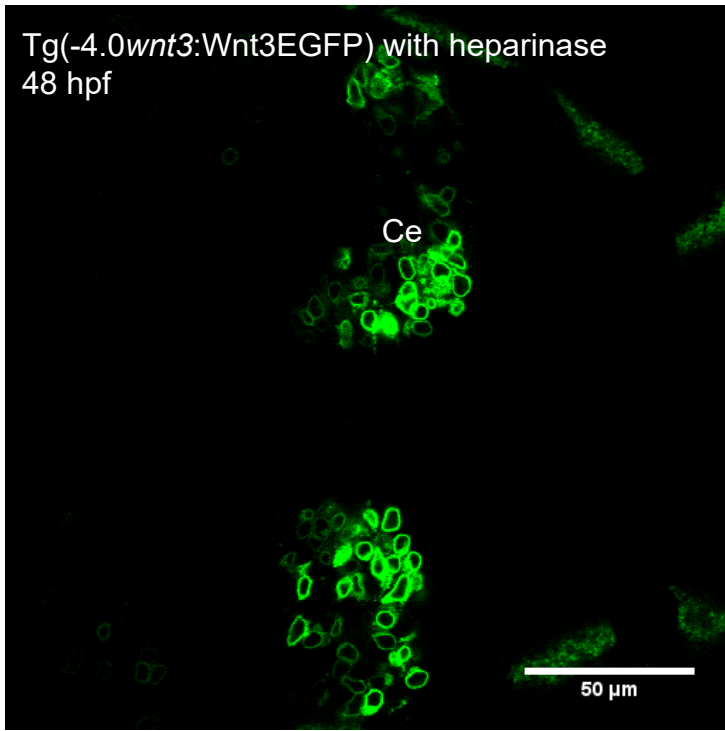**B**

Dextran-TRITC with heparinase in  
48 hpf

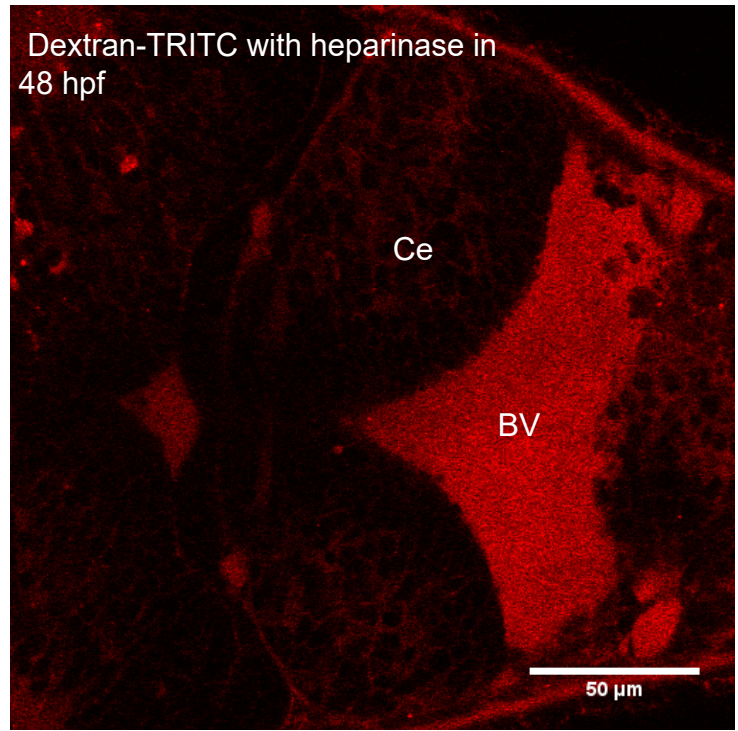**C**

Tg(-4.0*wnt3*:Wnt3EGFP) with Surfen  
48 hpf

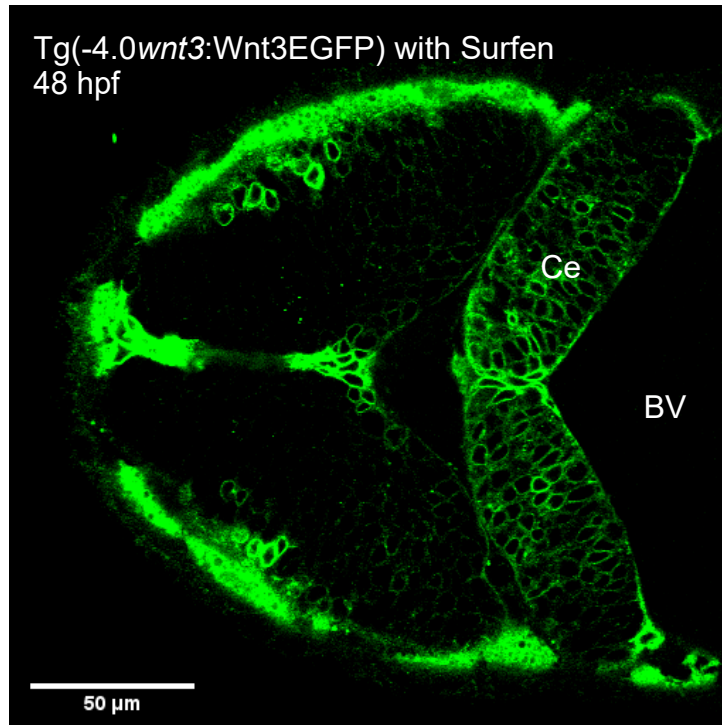

Supplement: table1-data1 [file elife-59489-table1-data1-v2.pdf]
